# Supplementary material
Source: Springer Nature journal article supplement (https://www.springermedizin.de/resource/supplementary/13058_2012_2929_MOESM6_ESM.pdf/9702866)

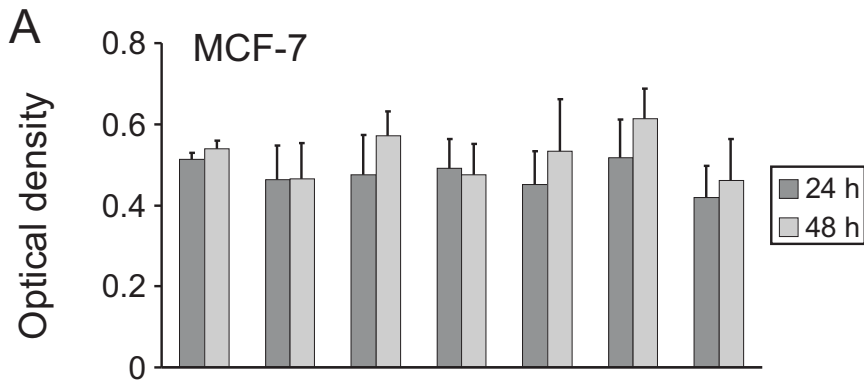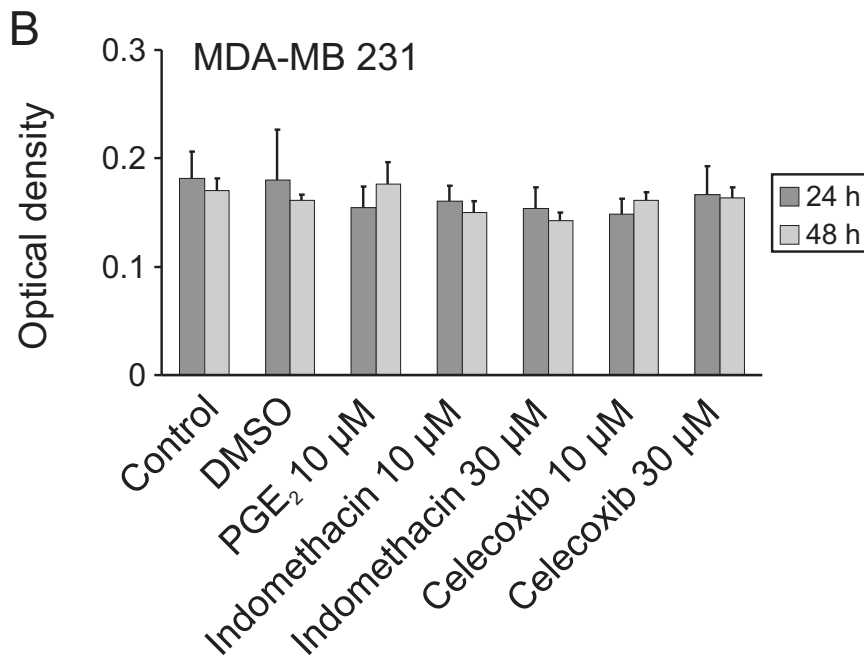

Supplement: MOESM6 [file 9702866]
